# Supplementary material
Source: Springer Nature journal article supplement (https://www.springermedizin.de/resource/supplementary/12936_2012_2634_MOESM5_ESM.pdf/9544860)
Supplement: MOESM5 [file 9544860]

## Additional file 5:

### Suggested $\text{Ca}^{2+}$ -dependent steps in parasite egress program

| <b>Location</b>                                         | <b>Process</b>                                                                                                                                | <b>Physiological Outcome</b>                                                                                                    |
|---------------------------------------------------------|-----------------------------------------------------------------------------------------------------------------------------------------------|---------------------------------------------------------------------------------------------------------------------------------|
| <b>Intracellular <math>\text{Ca}^{2+}</math> stores</b> | <b>Release of free <math>\text{Ca}^{2+}</math> from the ER, activation of enzymes involved in parasite egress: PfCDPK5, proteases?</b>        | <b>Initiation of parasite egress.</b>                                                                                           |
| <b>Parasitophorous vacuole/erythrocyte cytoplasm</b>    | <b><math>\text{Ca}^{2+}</math> -dependent increase in the PVM permeability to ions: <math>\text{Na}^+</math> and <math>\text{K}^+</math>?</b> | <b>Vacuole swelling due to ion/water fluxes into the vacuole from the host cytoplasm.</b>                                       |
| <b>Erythrocyte cytoplasm</b>                            | <b><math>\text{Ca}^{2+}</math>-dependent activation of host protease calpain and release of membrane pore-forming agents.</b>                 | <b>Digestion of erythrocyte cytoskeleton, poration of erythrocyte membrane and weakening of erythrocyte membrane stability.</b> |
